# Supplementary material for: Hypervirulent Klebsiella pneumoniae causing aortitis retains its capsule and mucoviscosity and remains genotypically and phenotypically stable over time
Source: Research Square preprint supplement (doi:10.21203/rs.3.rs-6740913/v1), 2025-08-05
Supplement: Supplementary file 1 [file 0b2e34591986f743142cf92b.xlsx]

## Sheet: Sheet1
		Supplementary Table 2: p-values for Statistical Comparisons
	Siderophores	Strains	Kp031824-1	Kp031824-2	Kp070124	Kp031824-1 G1	Kp031824-1 G2	Kp031824-2 G3	hvKp1	cKp1		90% Serum AUC	Strains	Kp031824-1	Kp031824-2	Kp070124	Kp031824-1 G1	Kp031824-1 G2	Kp031824-2 G3	hvKp1	MRSN110821
		Kp031824-1	–		p=0.9950 ns					p<0.0001 ****			Kp031824-1	–		p>0.9999 ns	p<0.0001 ****	p<0.0001 ****
		Kp031824-2		–	p=0.0176 *					p<0.0001 ****			Kp031824-2		–	p>0.9999 ns			p<0.0001 ****
		Kp070124	p=0.9950 ns	p=0.0176 *	–					p<0.0001 ****			Kp070124	p>0.9999 ns	p>0.9999 ns	–
		Kp031824-1 G1				–							Kp031824-1 G1	p<0.0001 ****			–
		Kp031824-1 G2					–						Kp031824-1 G2	p<0.0001 ****				–
		Kp031824-2 G3						–					Kp031824-2 G3		p<0.0001 ****				–
		hvKp1							–	p<0.0001 ****			hvKp1							–
		cKp1	p<0.0001 ****	p<0.0001 ****	p<0.0001 ****				p<0.0001 ****	–			MRSN110821								–
	LB Mucoviscosity	Strains	Kp031824-1	Kp031824-2	Kp070124	Kp031824-1 G1	Kp031824-1 G2	Kp031824-2 G3	hvKp1	cKp1		90% ∆56ºC Serum AUC	Strains	Kp031824-1	Kp031824-2	Kp070124	Kp031824-1 G1	Kp031824-1 G2	Kp031824-2 G3	hvKp1	MRSN110821
		Kp031824-1	–		p>0.9999 ns	p<0.0001 ****	p<0.0001 ****			p<0.0001 ****			Kp031824-1	–		p=0.6267 ns	p=0.4971 ns	p=0.1944 ns
		Kp031824-2		–	p=0.9566 ns			p<0.0001 ****		p<0.0001 ****			Kp031824-2		–	p=0.8270 ns			p=0.9998 ns
		Kp070124	p>0.9999 ns	p=0.9566 ns	–					p<0.0001 ****			Kp070124	p=0.6267 ns	p=0.8270 ns	–
		Kp031824-1 G1	p<0.0001 ****			–				p=0.9987 ns			Kp031824-1 G1	p=0.4971 ns			–
		Kp031824-1 G2	p<0.0001 ****				–			p=0.9019 ns			Kp031824-1 G2	p=0.1944 ns				–
		Kp031824-2 G3		p<0.0001 ****				–		p=0.9886 ns			Kp031824-2 G3		p=0.9998 ns				–
		hvKp1							–	p<0.0001 ****			hvKp1							–
		cKp1	p<0.0001 ****	p<0.0001 ****	p<0.0001 ****	p=0.9987 ns	p=0.9019 ns	p=0.9886 ns	p<0.0001 ****	–			MRSN110821								–
	che-m9-CA-te Mucoviscosity	Strains	Kp031824-1	Kp031824-2	Kp070124	Kp031824-1 G1	Kp031824-1 G2	Kp031824-2 G3	hvKp1	cKp1		90% Ascites AUC	Strains	Kp031824-1	Kp031824-2	Kp070124	Kp031824-1 G1	Kp031824-1 G2	Kp031824-2 G3	hvKp1	MRSN110821		LD50	Strains	Kp031824-1	Kp031824-2	Kp070124	Kp031824-1 G1	Kp031824-1 G2	Kp031824-2 G3	hvKp1	MRSN110821
		Kp031824-1	–		p=0.5301 ns	p<0.0001 ****	p<0.0001 ****			p<0.0001 ****			Kp031824-1	–		p=0.3676 ns								Kp031824-1	–	p=0.2000 ns	p=0.9414 ns	p<0.0001 ****	p<0.0001 ****
		Kp031824-2		–	p=0.9488 ns			p<0.0001 ****		p<0.0001 ****			Kp031824-2		–	p=0.9998 ns								Kp031824-2	p=0.2000 ns	–	p=0.1945 ns			p<0.0001 ****
		Kp070124	p=0.5301 ns	p=0.9488 ns	–					p<0.0001 ****			Kp070124	p=0.3676 ns	p=0.9998 ns	–								Kp070124	p=0.9414 ns	p=0.1945 ns	–
		Kp031824-1 G1	p<0.0001 ****			–				p>0.9999 ns			Kp031824-1 G1				–							Kp031824-1 G1	p<0.0001 ****			–
		Kp031824-1 G2	p<0.0001 ****				–			p=0.2599 ns			Kp031824-1 G2					–						Kp031824-1 G2	p<0.0001 ****				–
		Kp031824-2 G3		p<0.0001 ****				–		p>0.9999 ns			Kp031824-2 G3						–					Kp031824-2 G3		p<0.0001 ****				–
		hvKp1							–	p<0.0001 ****			hvKp1							–				hvKp1							–
		cKp1	p<0.0001 ****	p<0.0001 ****	p<0.0001 ****	p>0.9999 ns	p=0.2599 ns	p>0.9999 ns	p<0.0001 ****	–			MRSN110821								–			MRSN110821								–
	LB AUC	Strains	Kp031824-1	Kp031824-2	Kp070124	Kp031824-1 G1	Kp031824-1 G2	Kp031824-2 G3	hvKp1	hvKp87		Capsule	Strains	Kp031824-1	Kp031824-2	Kp070124	Kp031824-1 G1	Kp031824-1 G2	Kp031824-2 G3	hvKp2	hvKp2∆pVir
		Kp031824-1	–		p=0.9992 ns								Kp031824-1	–	p>0.9999 ns	p>0.9999 ns	p<0.0001 ****	p<0.0001 ****
		Kp031824-2		–	p=0.6516 ns								Kp031824-2	p>0.9999 ns	–	p>0.9999 ns			p<0.0001 ****
		Kp070124	p=0.9992 ns	p=0.6516 ns	–								Kp070124	p>0.9999 ns	p>0.9999 ns	–
		Kp031824-1 G1				–							Kp031824-1 G1	p<0.0001 ****			–
		Kp031824-1 G2					–						Kp031824-1 G2	p<0.0001 ****				–
		Kp031824-2 G3						–					Kp031824-2 G3		p<0.0001 ****				–
		hvKp1							–				hvKp2							–	p=0.5420 ns
		hvKp87								–			hvKp2∆pVir							p=0.5420 ns	–
	che-m9-CA-te AUC	Strains	Kp031824-1	Kp031824-2	Kp070124	Kp031824-1 G1	Kp031824-1 G2	Kp031824-2 G3	hvKp1	hvKp87		Phagocytosis	Strains	Kp031824-1	Kp031824-2	Kp070124	Kp031824-1 G1	Kp031824-1 G2	Kp031824-2 G3	hvKp2	hvKp2∆pVir
		Kp031824-1	–		p=0.0522 ns								Kp031824-1	–	p=0.9204 ns	p>0.9999 ns	p<0.0001 ****	p<0.0001 ****
		Kp031824-2		–	p<0.0001 ****								Kp031824-2	p=0.9204 ns	–	p=0.9778 ns		p<0.0001 ****
		Kp070124	p=0.0522 ns	p<0.0001 ****	–								Kp070124	p>0.9999 ns	p=0.9778 ns	–
		Kp031824-1 G1				–							Kp031824-1 G1	p<0.0001 ****			–
		Kp031824-1 G2					–						Kp031824-1 G2	p<0.0001 ****				–
		Kp031824-2 G3						–					Kp031824-2 G3		p<0.0001 ****				–
		hvKp1							–				hvKp2							–	p<0.0001 ****
		hvKp87								–			hvKp2∆pVir							p<0.0001 ****	–
