# Supplementary material for: Hypervirulent Klebsiella pneumoniae causing aortitis retains its capsule and mucoviscosity and remains genotypically and phenotypically stable over time
Source: Research Square preprint supplement (doi:10.21203/rs.3.rs-6740913/v1), 2025-08-05
Supplement: Supplementary file 2 [file 0f0add0bb23cbe122c68e38e.xlsx]

## Sheet: Sheet1
	Supplementary Table 3: Primary Data for In Vivo Sub-cutaneous Challenge of CD1 Mice
	Strain	Inoculum (CFU)	14 Days Post Inoculum	N	LD50
			% Mortality
	Kp031824-1	645	20	5	763
		6800	100	5
		400000	100	5
	Kp031824-2	645	100	5	159.2
		6800	80	5
		400000	60	5
	Kp070124	640	60	5	1050
		6900	40	5
		7750	80	5
		63000	100	5
	Kp031824-1 G1	275000	0	5	3.95e+18
		27500000	0	5
	Kp031824-1 G2	280000	0	5	504000000
		28000000	20	5
	Kp031824-2 G3	250000	0	5	3.59e+18
		25000000	0	5
