# Supplementary material for: Hypervirulent Klebsiella pneumoniae causing aortitis retains its capsule and mucoviscosity and remains genotypically and phenotypically stable over time
Source: Research Square preprint supplement (doi:10.21203/rs.3.rs-6740913/v1), 2025-08-05
Supplement: Supplementary file 4 [file e2979f6d6716a76fbca56700.xlsx]

## Sheet: Sheet1
		Supplementary Table 1 : Means, SD, n
			Siderophores (µg/mL)	LB Mucoviscosity (post/pre OD600)	che-m9-CA-te Mucoviscosity (post/pre OD600)	LB AUC	che-m9-CA-te AUC	Serum AUC	∆56ºC Serum AUC	Ascites AUC	Log10(LD50)	Phagocytosis [Log10(CFU/mL)]	{Uronic Acid] (uM)
		Kp031824-1	275.5 ± 47.28 n=12	0.679 ± 0.041 n=3	0.789 ± 0.050 n=3	21.70 ± 0.6044 n=9	14.64 ± 0.1412 n=9	18.41 ± 6.058 n=6	176.7 ± 2.498 n=6	80.82 ± 40.32 n=9	2.883	3.083 ± 0.2675 n=12	495.2 ± 70.95 n=6
		Kp031824-2	325.4 ± 26.22 n=12	0.722 ± 0.050 n=3	0.771 ± 0.008 n=3	21.94 ± 0.4674 n=9	15.18 ± 0.08368 n=9	15.81 ± 7.263 n=6	164.7 ± 14.93 n=6	105.6 ± 39.93 n=9	2.201	3.197 ± 0.3295 n=9	505.3 ± 195.5 n=6
		Kp070124	283.1 ± 65.23 n=12	0.691 ± 0.024 n=3	0.740 ± 0.023 n=3	21.71 ± 0.6710 n=9	14.79 ± 0.1681 n=9	16.93 ± 8.586 n=6	169.9 ± 9.955 n=6	106.0 ± 47.72 n=9	3.021	3.101 ± 0.3054 n=9	492.4 ± 103.3
		Kp031824-1 G1	239.5 ± 18.42 n=12	0.040 ± 0.0008 n=3	0.026 ± 0.009 n=3	23.17 ± 0.8648 n=9	15.18 ± 0.2398 n=9	152.1 ± 16.75 n=7	169.0 ± 5.545 n=6	141.2 ± 21.63 n=9	9*	5.740 ± 0.1869 n=9	132.4 ± 21.82 n=6
		Kp031824-1 G2	247.6 ± 30.14 n=12	0.055 ± 0.017 n=3	0.098 ± 0.034 n=3	23.37 ± 0.9249 n=9	16.48 ± 0.1396 n=9	127.2 ± 25.61 n=6	166.3 ± 6.867 n=6	133.5 ± 36.30 n=9	8.703	4.891 ± 0.1431 n=9	123.0 ± 15.43 n=6
		Kp031824-2 G3	231.9 ± 23.00 n=12	0.046 ± 0.014 n=3	0.025 ± 0.009 n=3	25.29 ± 0.8541 n=9	15.56 ± 0.5931 n=9	163.1 ± 15.20 n=6	165.9 ± 5.171 n=6	165.5 ± 7.174 n=9	9*	5.662 ± 0.1894 n=9	133.4 ± 28.85 n=6
		hvKp1	83.92 ± 12.12 n=12	0.197 ± 0.043 n=3	0.416 ± 0.036 n=3	17.96 ± 0.2066 n=3	15.88 ± 0.2542 n=3	109.2 ± 60.85 n=5	134.6 ± 15.31 n=4	126.7 ± 36.09 n=5	–	–	231.1 ± 66.43 n=4
		cKp1	3.665 ± 0.6497 n=11	0.020 ± 0.016 n=3	0.031 ± 0.009 n=2	–	–	–	–	–	–	–	–
		hvKp87	–	–	–	18.81 ± 0.1518 n=3	10.60 ± 0.1779 n=3	–	–	–	–	–	–
		MRSN110821	–	–	–	–	–	13.54 ± 10.82 n=5	154.7 ± 17.59 n=4	8.042 ± 0.7516 n=4	–	–	–
		hvKp1∆pVir	–	–	–	–	–	–	–	–	–	–	–
		hvKp2	–	–	–	–	–	–	–	–	–	4.370 ± 0.1855 n=6	264 ± 88.61 n=6
		hvKp2∆pVir	–	–	–	–	–	–	–	–	–	6.150 ± 0.3137 n=6	181.5 ± 30.63 n=6
		*an upper cutoff value of Log10(LD50) equal to 9 was employed to correct for biologically implausible LD50 values.
